# Supplementary material for: The thickness-dependent response of aerosol-jet-printed ultrathin high-aspect-ratio electrochemical microactuators
Source: Royal Society of Chemistry journal article supplement (doi:10.1039/d4sm00886c), 2024-01-01
Supplement: d4sm00886c1.pdf [file d4sm00886c1.pdf]

## Supplementary Information

### Thickness-dependent response of aerosol-jet-printed ultrathin high-aspect-ratio electrochemical microactuators

Ji Zhang,<sup>ab</sup> Jeremy J. Baumberg<sup>\*b</sup> and Sohini Kar-Narayan<sup>\*a</sup>

<sup>a</sup> *Department of Materials Science & Metallurgy, University of Cambridge, 27 Charles Babbage Road, Cambridge CB3 0FS, UK. E-mail: [sk568@cam.ac.uk](mailto:sk568@cam.ac.uk)*

<sup>b</sup> *NanoPhotonics Centre, Cavendish Laboratory, University of Cambridge, JJ Thomson Avenue, Cambridge CB3 0HE, UK. E-mail: [jjb12@cam.ac.uk](mailto:jjb12@cam.ac.uk)*

**Table S1. Printing parameters for each ink**

|                                | <b>PEDOT:PSS</b>                 | <b>Nafion</b>    | <b>Nafion encapsulation</b> | <b>Au</b>             |   |
|--------------------------------|----------------------------------|------------------|-----------------------------|-----------------------|---|
| Atomiser                       | Ultrasonic                       | Pneumatic        | Pneumatic                   | Ultrasonic            |   |
| Atomiser current               | ~0.6 A                           | n/a              | n/a                         | ~0.6 A                |   |
| Bubbler                        | DI water                         | Ethanol          | Ethanol                     | DI water              |   |
| Nozzle size                    | 300 $\mu\text{m}$                |                  |                             |                       |   |
| Ambient temperature            | ~20 $^{\circ}\text{C}$           |                  |                             |                       |   |
| Platen temperature             | 80 $^{\circ}\text{C}$            |                  |                             |                       |   |
| Chiller temperature            | 20 $^{\circ}\text{C}$            | n/a              | n/a                         | 20 $^{\circ}\text{C}$ |   |
| Sheath flow rate               | 140 sccm                         | 140 sccm         | 140 sccm                    | 140 sccm              |   |
| Ink flow rate <sup>†</sup>     | 30-50 sccm                       | 520-550 sccm     | 500-520 sccm                | 15-23 sccm            |   |
| Exhaust flow rate <sup>†</sup> | n/a                              | 440-480 sccm     | 450-460 sccm                | n/a                   |   |
| Printing speed                 | 5 mm/s                           | 5 mm/s           | 5 mm/s                      | 5 mm/s                |   |
| Raster line separation         | 20 $\mu\text{m}$                 | 20 $\mu\text{m}$ | 40 $\mu\text{m}$            | 20 $\mu\text{m}$      |   |
| No. of printing passes         | Varying PEDOT:PSS thickness      | 1, 2, 3, 4, 5, 6 | 8                           | 1                     | 2 |
|                                | Varying Nafion thickness         | 2                | 5, 8, 11, 14, 17, 20        | 1                     | 2 |
|                                | Varying actuator length          | 2                | 8                           | 1                     | 2 |
| Curing condition               | 150 $^{\circ}\text{C}$ , 2 hours |                  |                             |                       |   |

<sup>†</sup>The ink and exhaust flow rates are sometimes slightly adjusted to compensate for the change in appearance of aerosol deposition over time.

n/a: Not applicable; sccm: standard cubic centimetres per minute

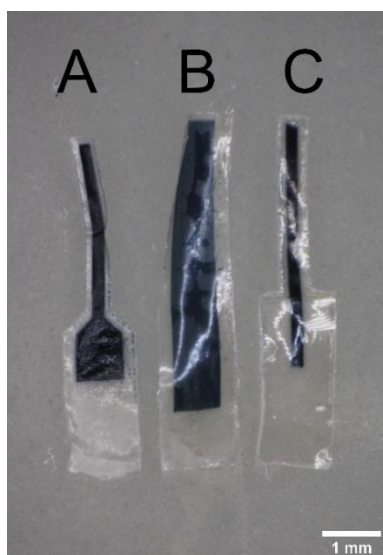

**Fig. S1.** Three PEDOT:PSS/Nafion/PEDOT:PSS actuator designs without incorporation of Au contact electrodes.

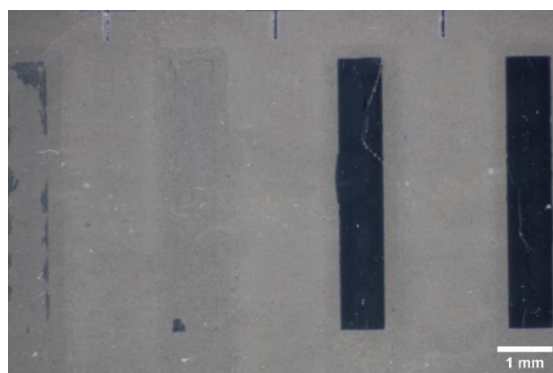

**Fig. S2.** Leftover bottom layer PEDOT:PSS after actuators (design A in **Fig. S1**) with different PEDOT:PSS thicknesses are peeled off. Left to right: 1 printing pass, 2 printing passes, 3 printing passes, and 4 printing passes.

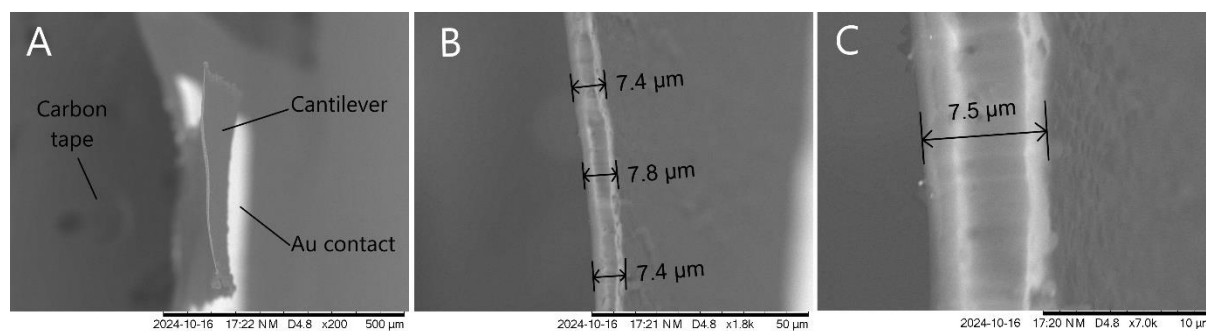

**Fig. S3.** SEM cross-sectional images of actuator with 4 PEDOT:PSS printing passes, taken at different magnifications.

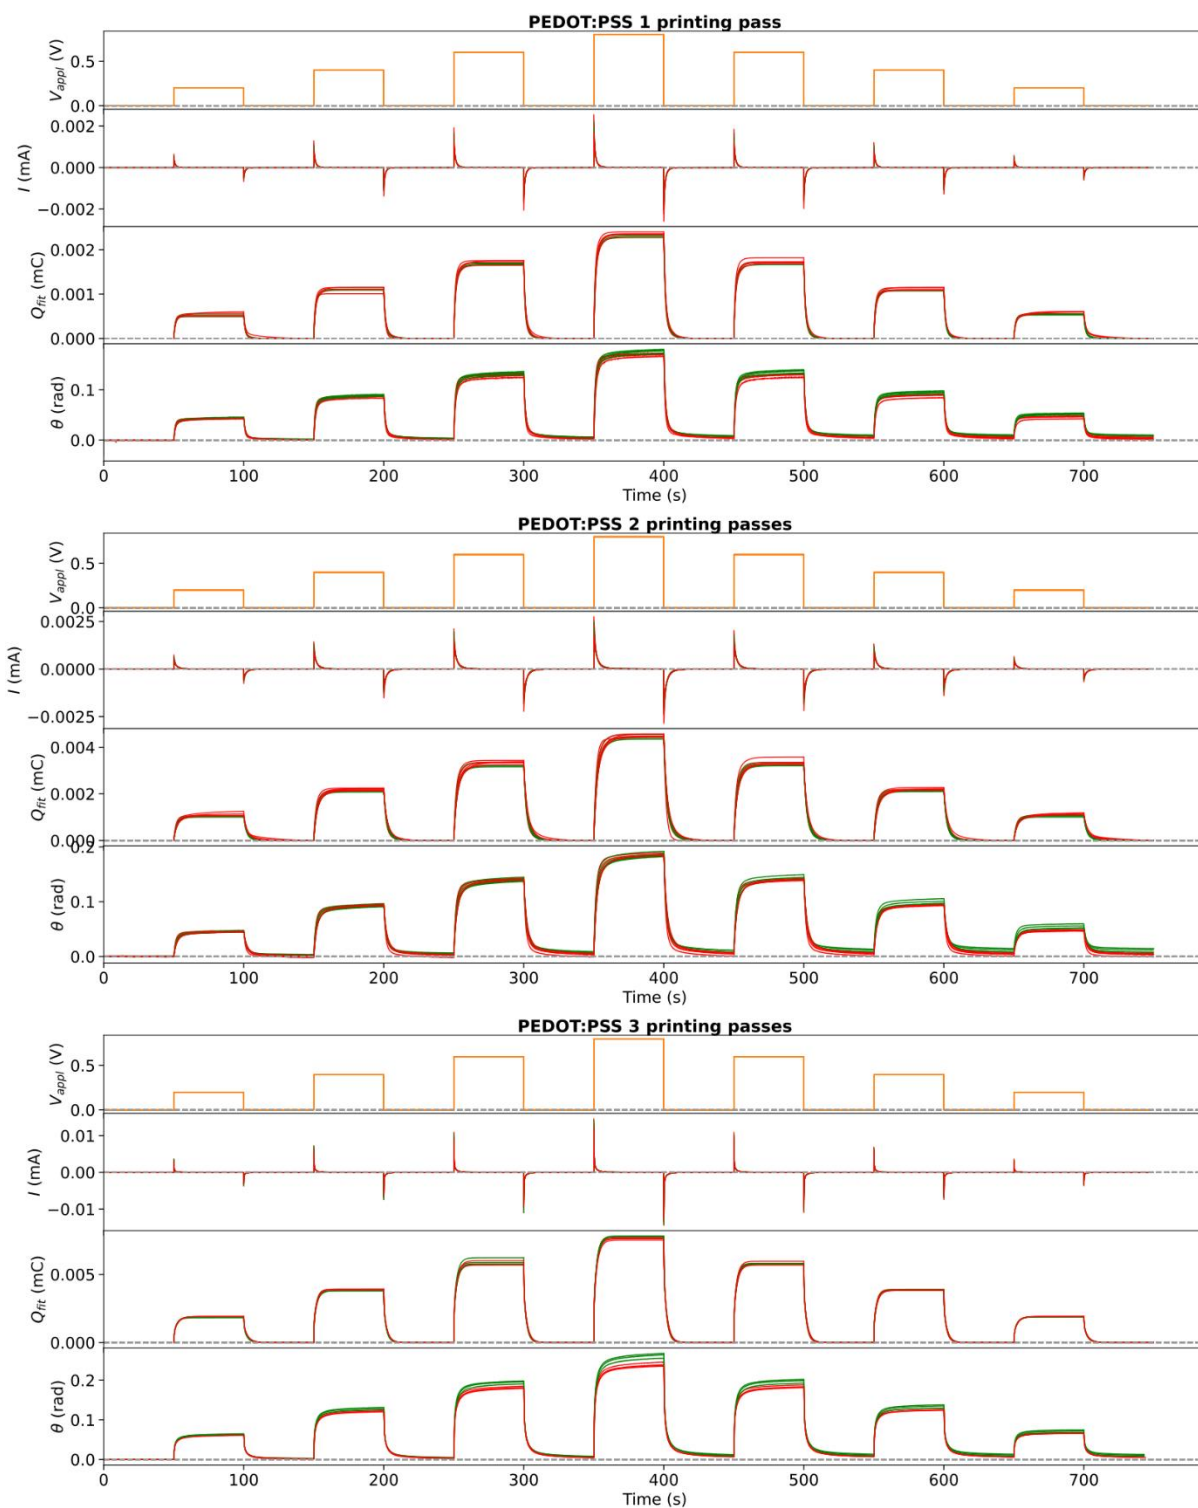

**Fig. S4.** Voltage, current, fitted charge, and deflection over time for DC actuation tests with varying PEDOT:PSS thicknesses. The red and green curves indicate voltage applied in both directions.

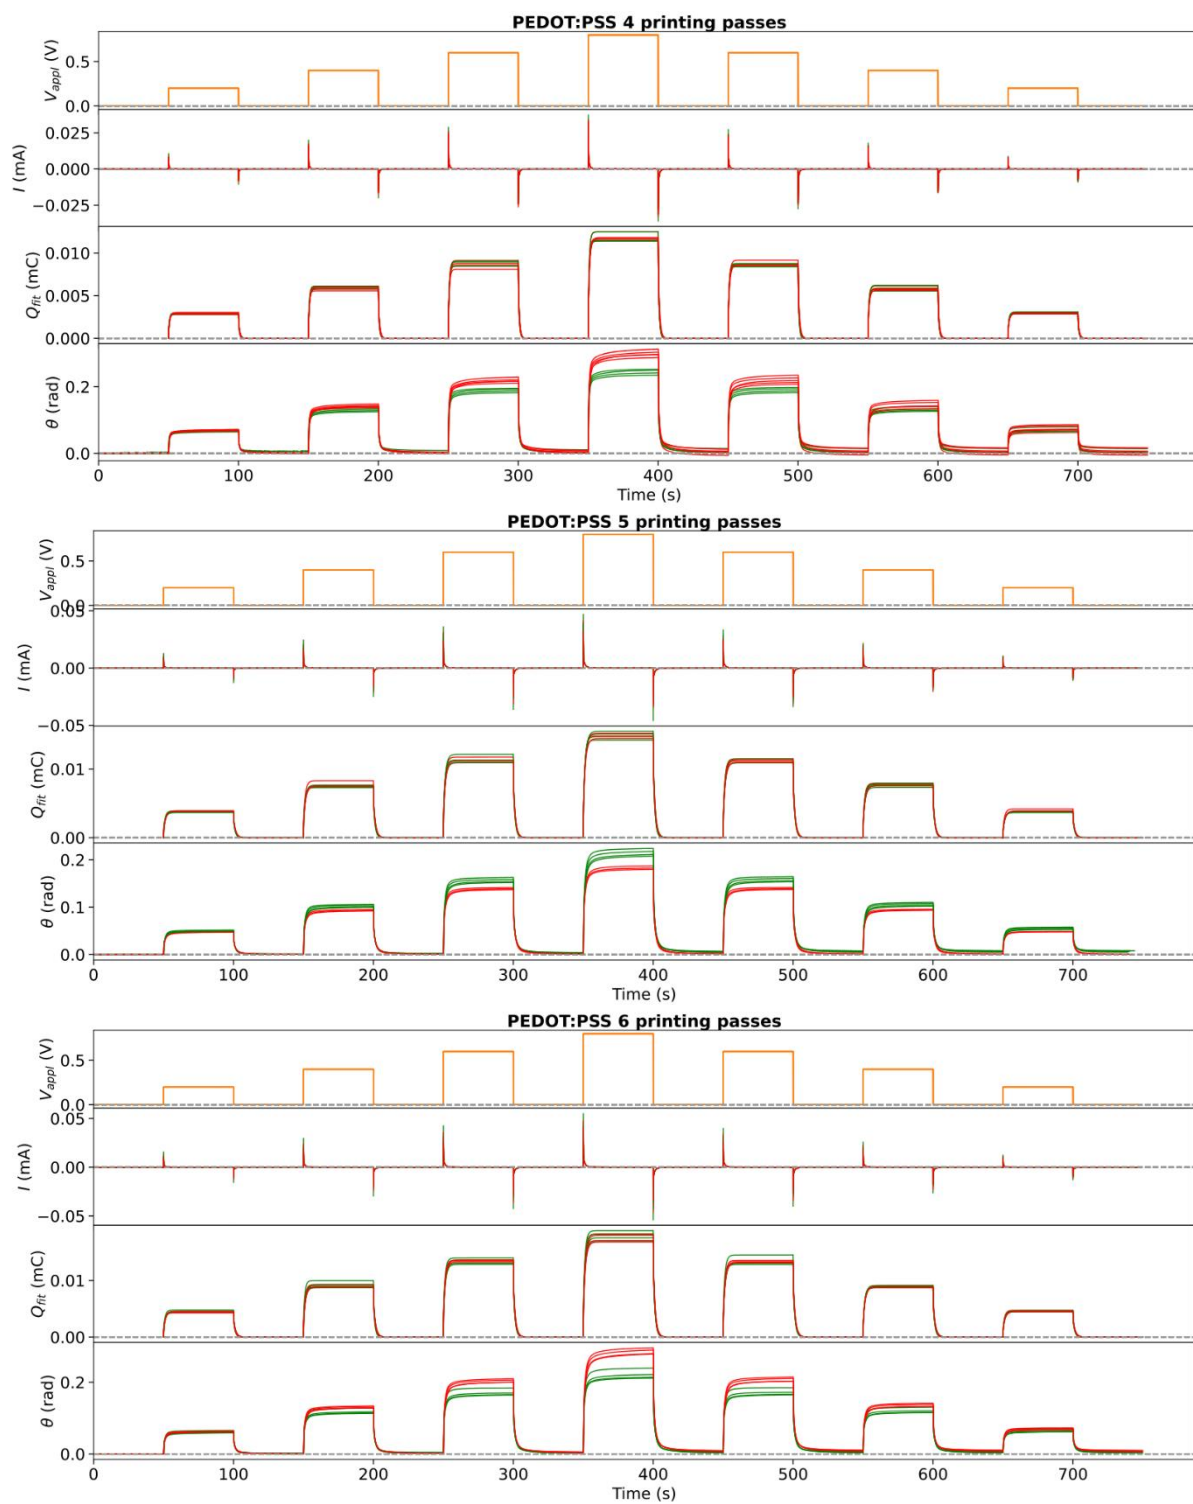

**Fig. S4 (cont'd).** Voltage, current, fitted charge, and deflection over time for DC actuation tests with varying PEDOT:PSS thicknesses. The red and green curves indicate voltage applied in both directions.

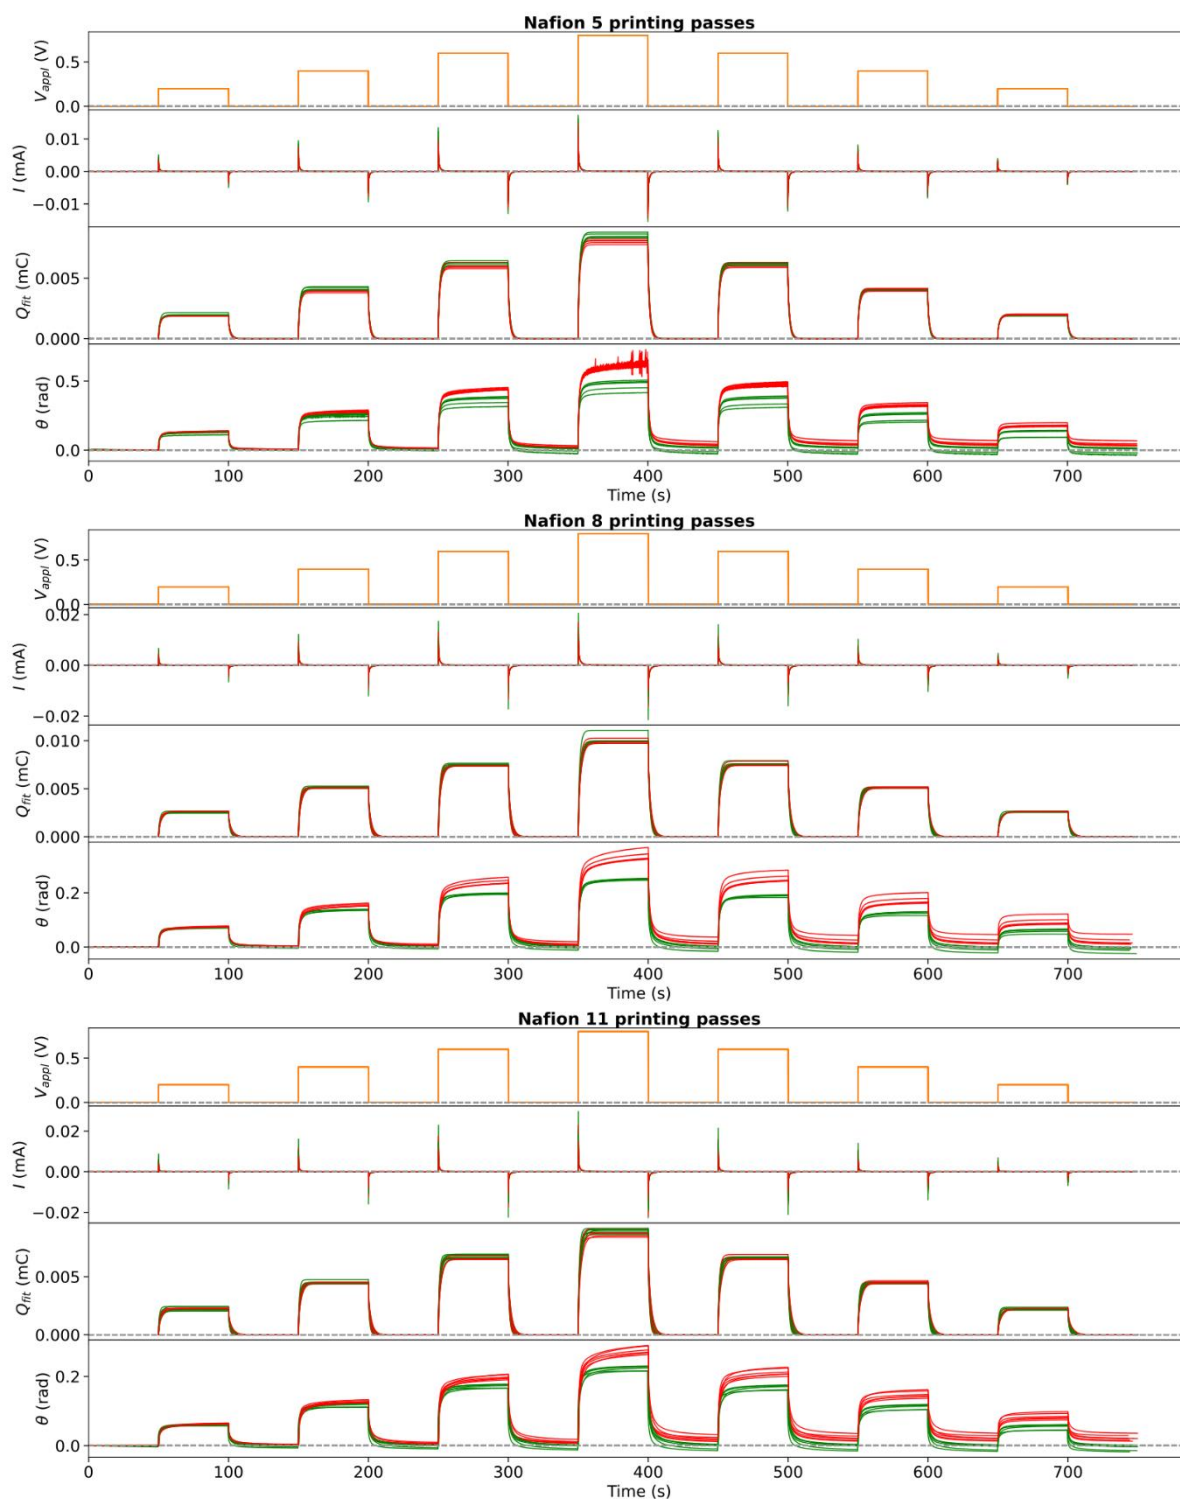

**Fig. S5.** Voltage, current, fitted charge, and deflection over time for DC actuation tests with varying Nafion electrolyte thicknesses. The red and green curves indicate voltage applied in both directions.

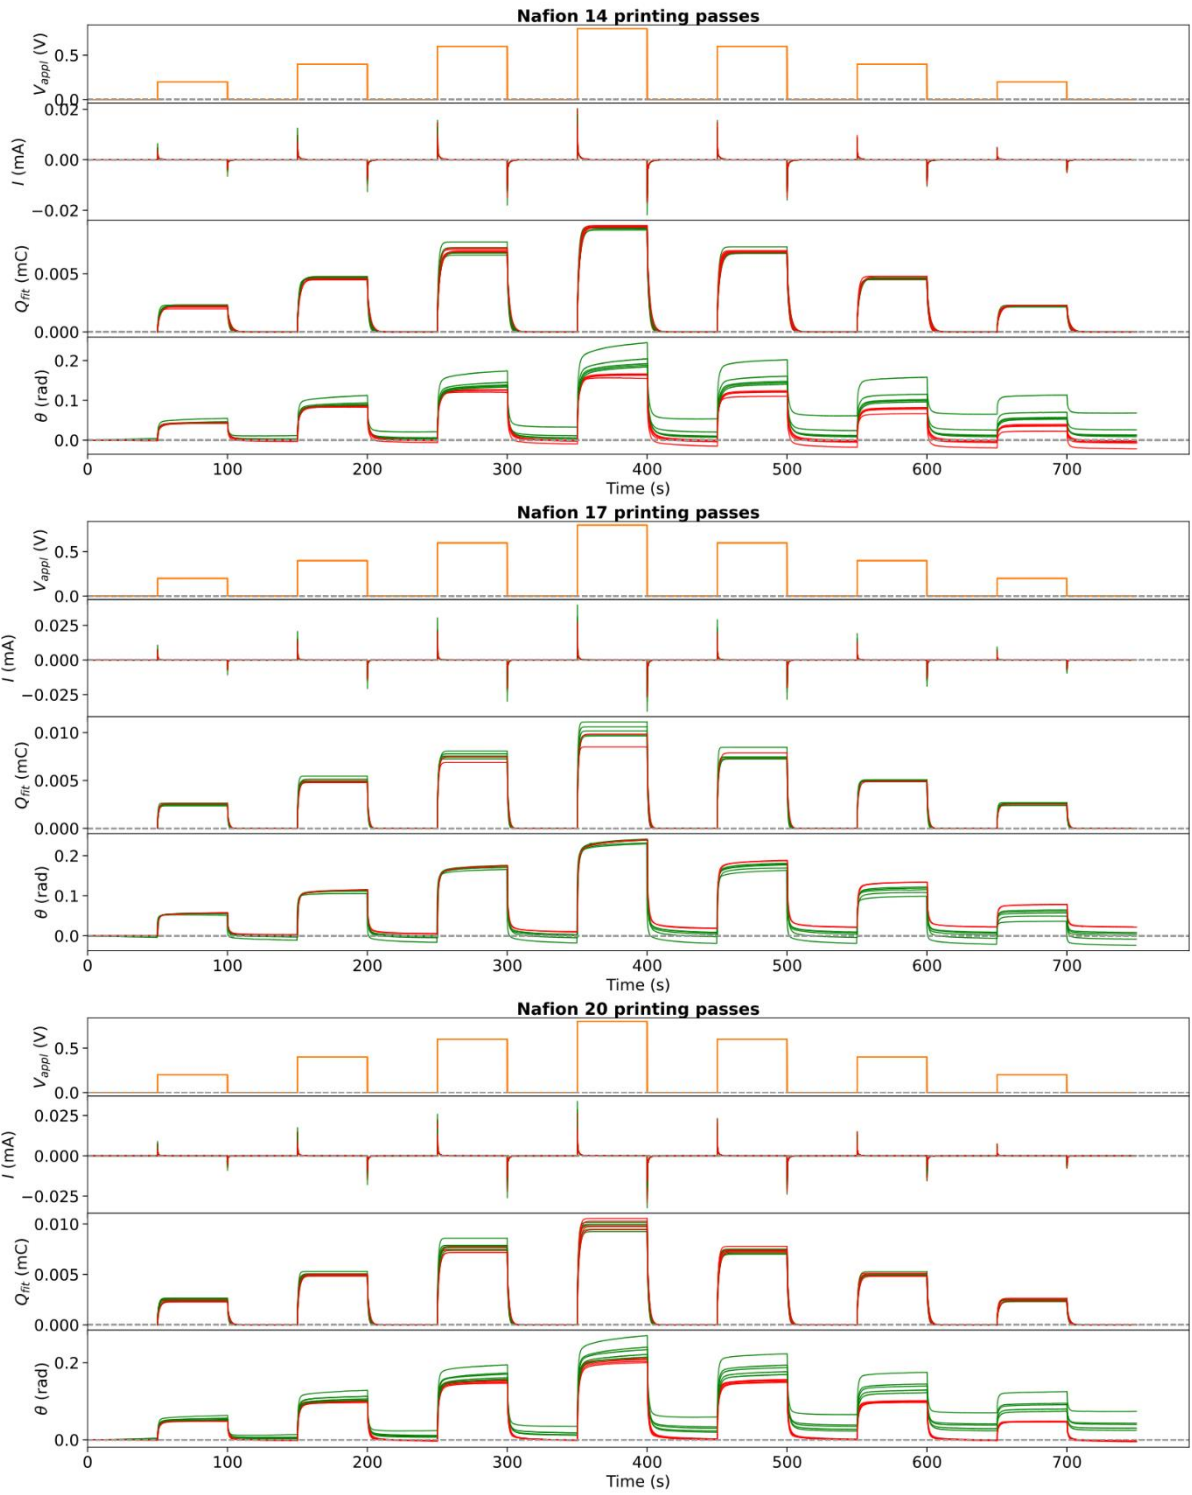

**Fig. S5 (cont'd).** Voltage, current, fitted charge, and deflection over time for DC actuation tests with varying Nafion electrolyte thicknesses. The red and green curves indicate voltage applied in both directions.



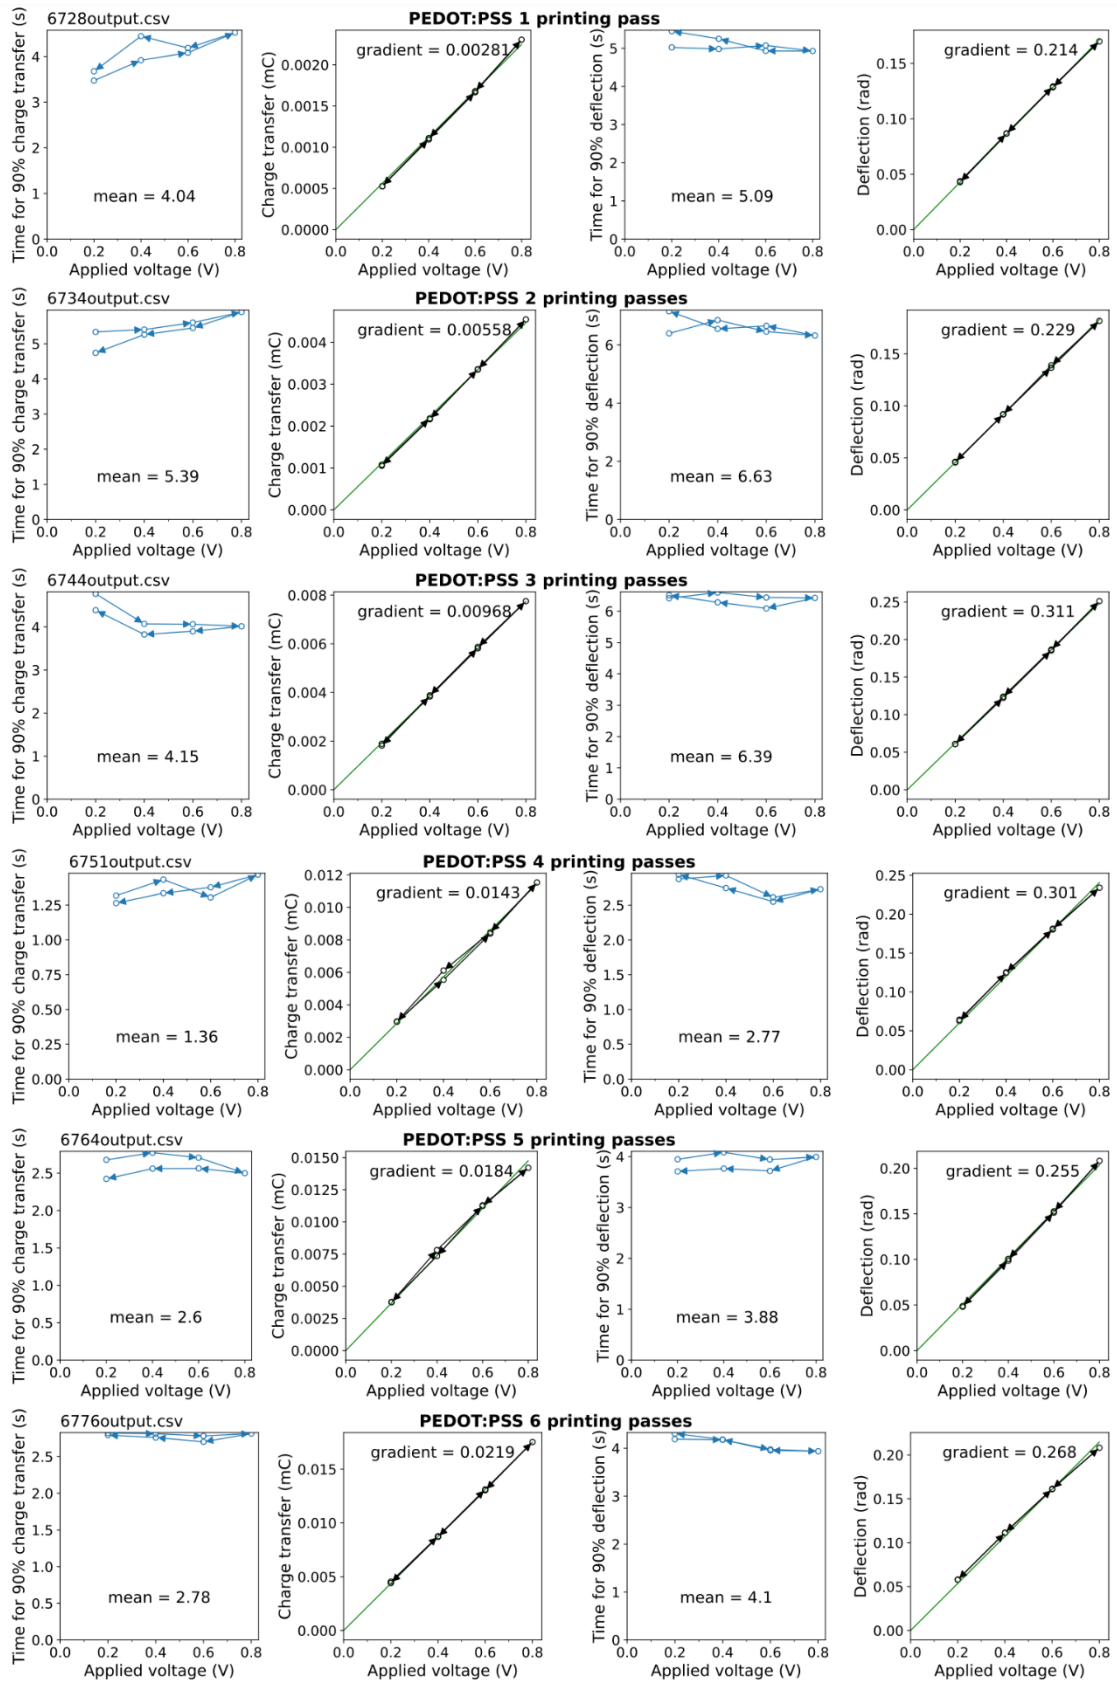

**Fig. S6.** Examples of actuation test analysis showing the dependence of steady-state charge transfer, steady-state deflection, and time to reach 90% of charge transfer/deflection on applied voltage for actuators with varying PEDOT:PSS thicknesses.

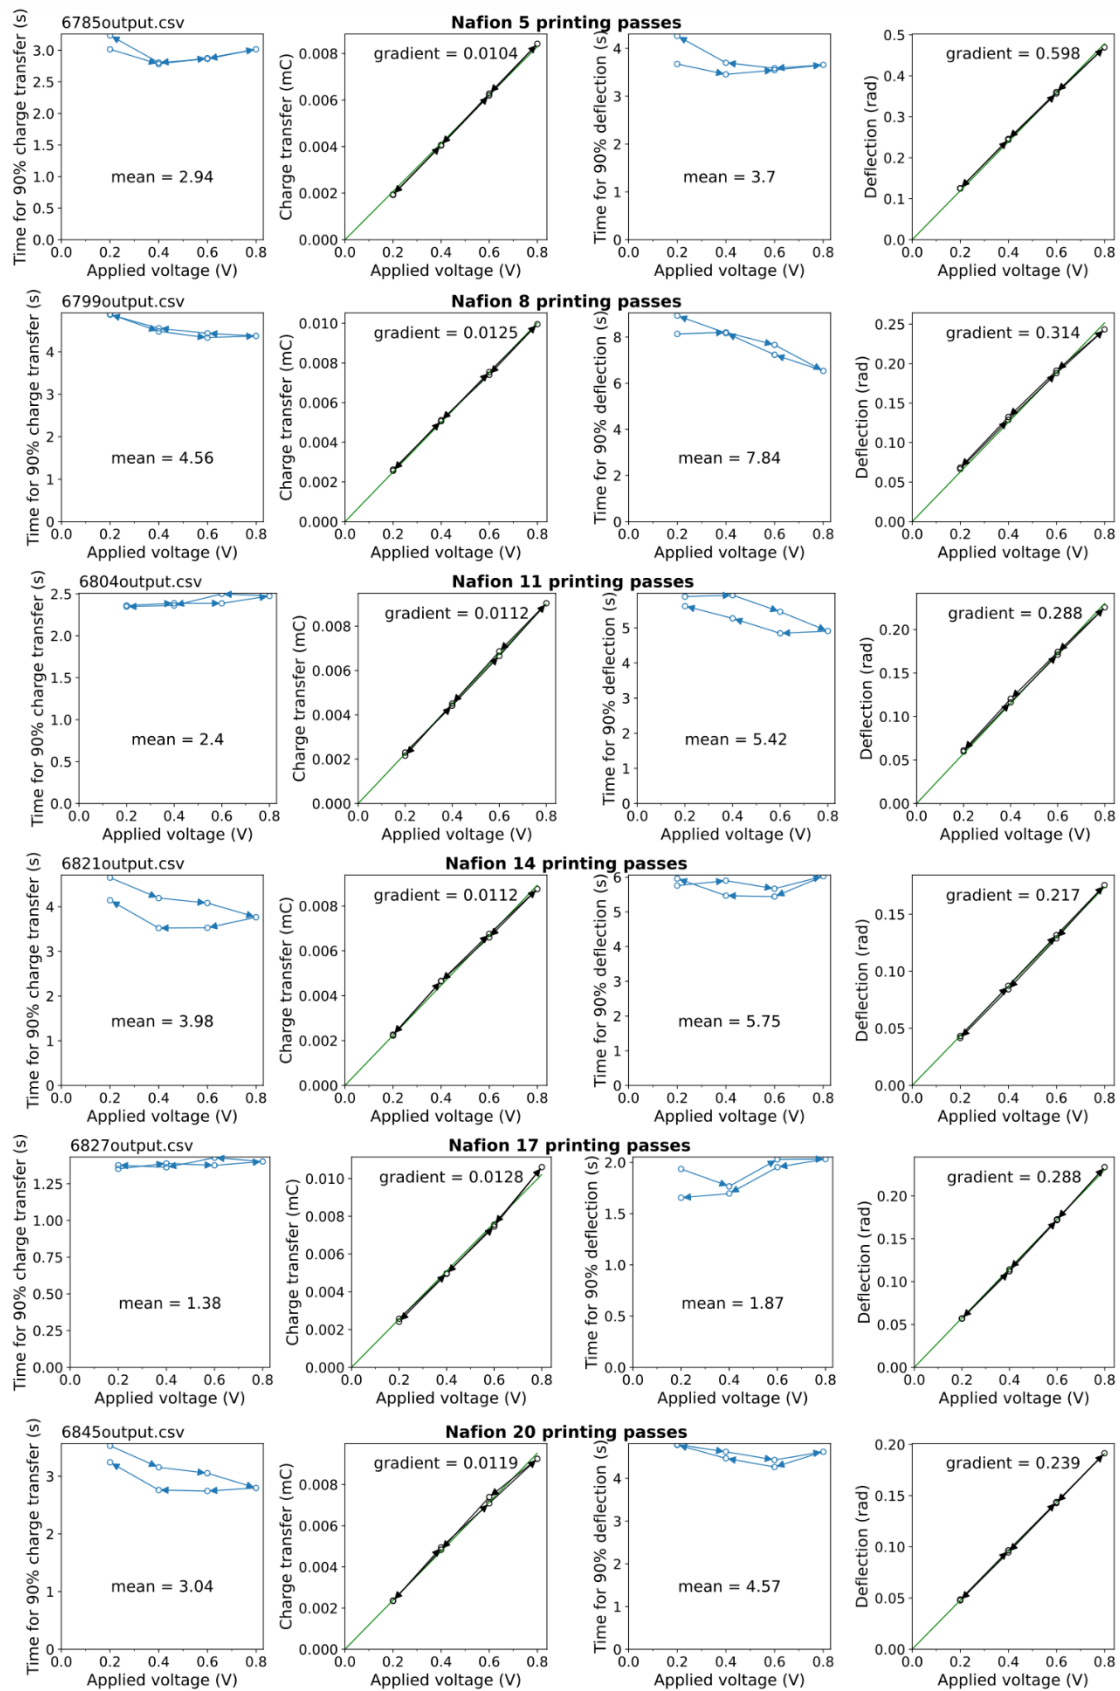

**Fig. S7.** Examples of actuation test analysis showing the dependence of steady-state charge transfer, steady-state deflection, and time to reach 90% of charge transfer/deflection on applied voltage for actuators with varying Nafion electrolyte thicknesses.



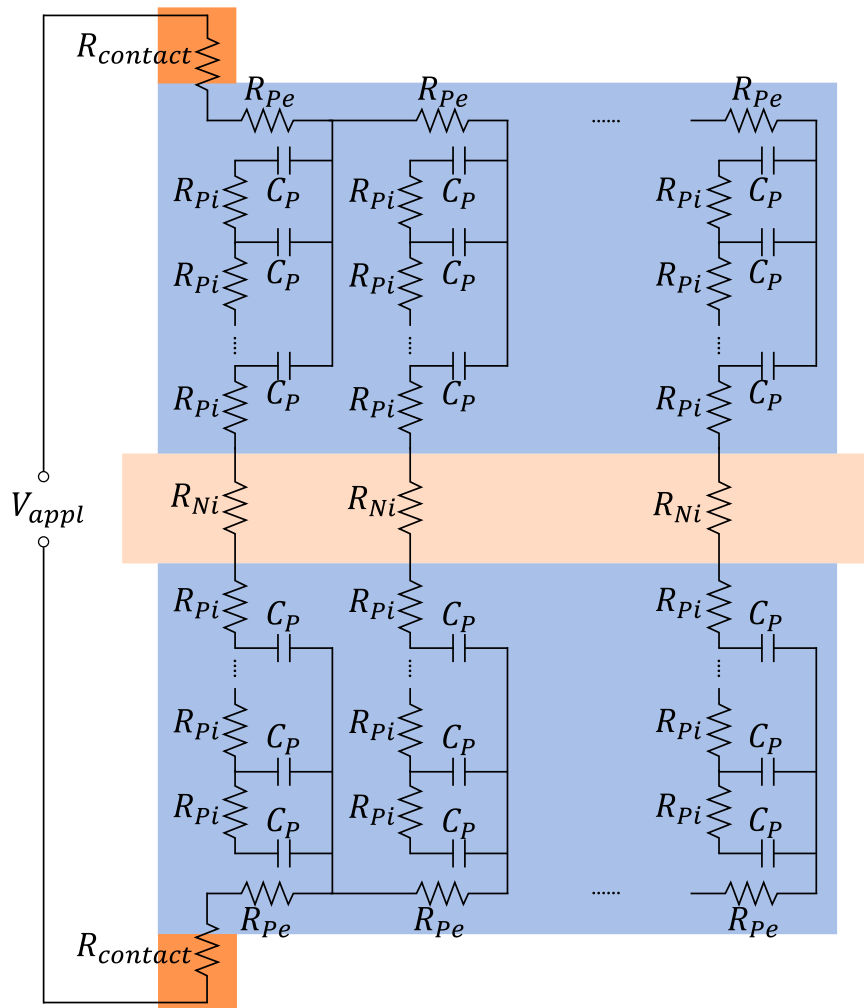

**Fig. S8.** Transmission line model of trilayer actuator.<sup>1-5</sup> The circuit elements  $R_{Pi}$ ,  $R_{Pe}$ , and  $C_P$  represent ionic resistance, electronic resistance and capacitance of small sections in PEDOT:PSS;  $R_{Ni}$  represents ionic resistance across portions of the Nafion electrolyte;  $R_{contact}$  represents the contact resistance. At steady state, the currents in all branches of the circuit are zero; thus, the electric potential only drops across the capacitors. Assuming uniform thicknesses and material properties of PEDOT:PSS along the length of the actuator, the potential in the Nafion electrolyte layer would be the same along the actuator. Hence, the capacitors in each PEDOT:PSS electrode can be combined and treated as one capacitor.

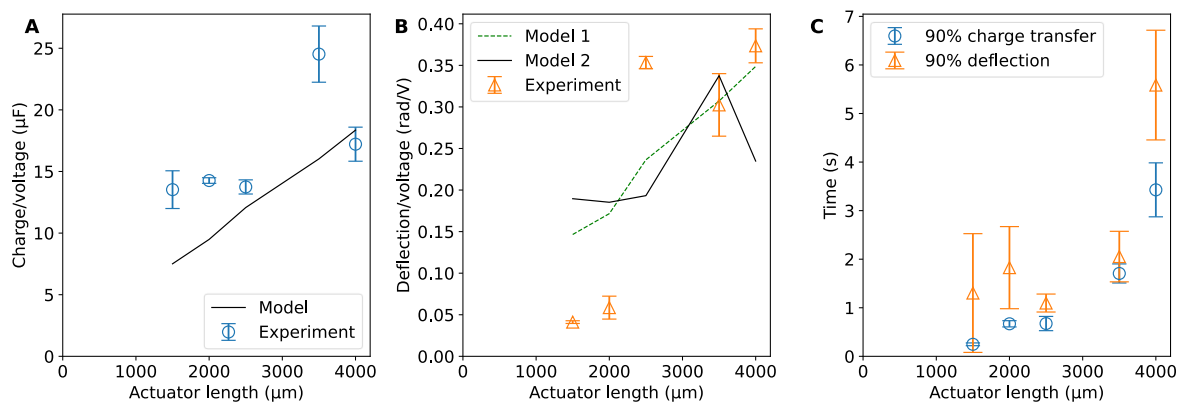

**Fig. S9.** (A) Charge-to-voltage ratio, (B) deflection-to-voltage ratio, and (C) time taken to reach 90% charging and 90% deflection for actuator samples with different lengths. The modelling results in (A) and (B) are discrete points with the same x-values as the experiment data but are connected with lines for visualisation. Error bars for all plots indicate standard deviation of data points with Bessel's correction.

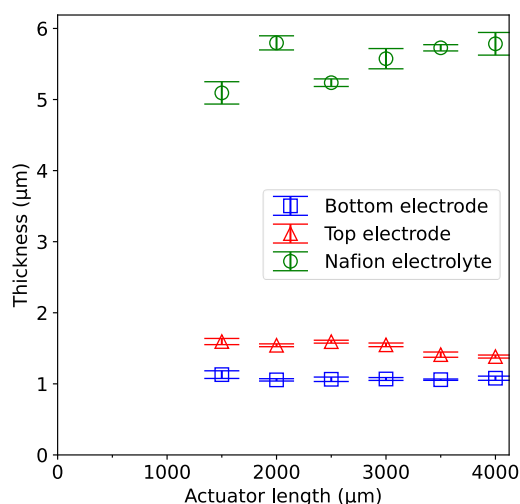

**Fig. S10.** Thicknesses of PEDOT:PSS and Nafion against number of printing passes in 6 actuator samples with length variation. The error bars indicate standard deviation of results from 4 profilometry scans with Bessel's correction.

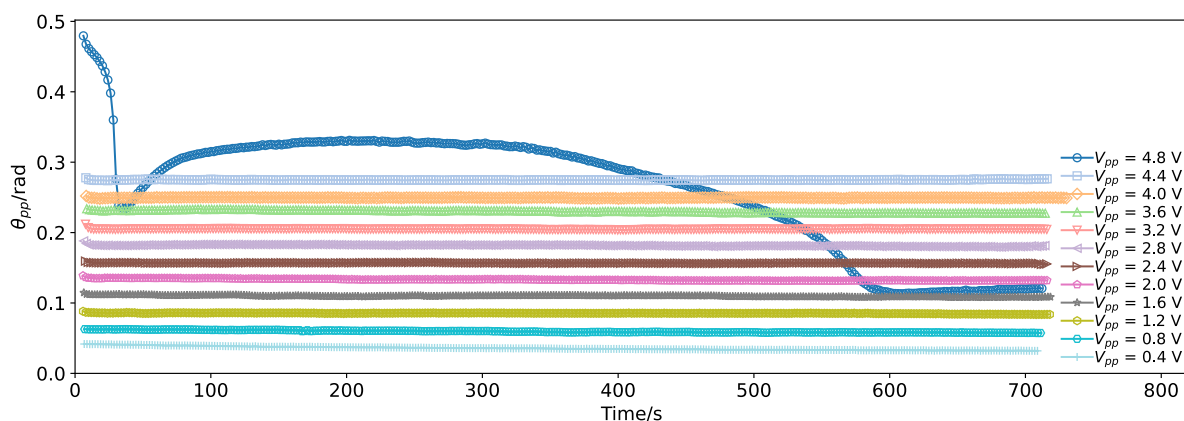

**Fig. S11.** Durability tests (of the actuator with 4 PEDOT:PSS printing passes) under sine waves at 0.5 Hz, for peak-to-peak voltages from 0.4 V to 4.8 V. Actuation showed minimal deterioration for more than 360 cycles for each voltage until the peak-to-peak voltage reached 4.8 V.

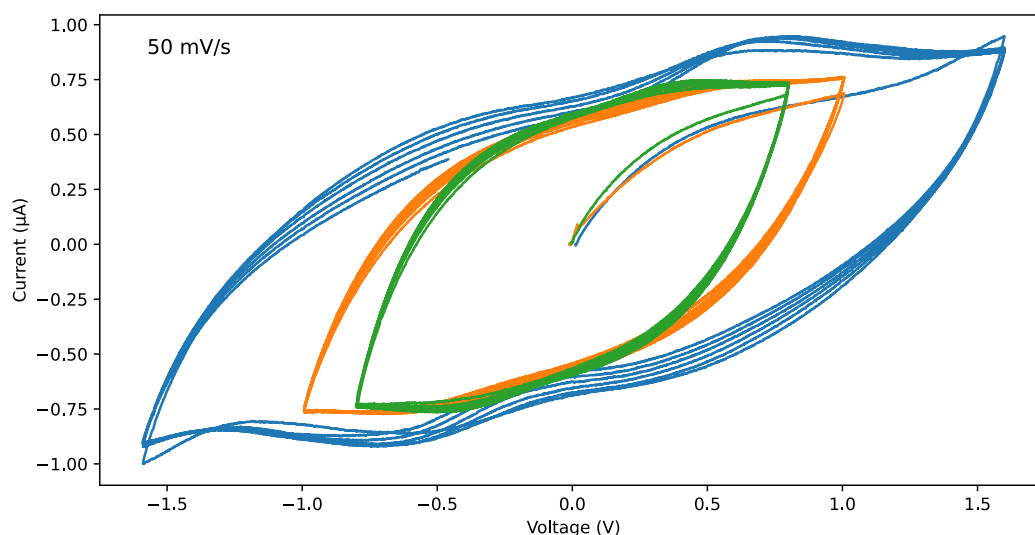

**Fig. S12.** Cyclic voltammograms (of the actuator with 4 PEDOT:PSS printing passes) measured at 50 mV s<sup>-1</sup> scan rate between ±0.8 V, ±1 V, and ±1.6 V.

## References

- 1 S. E. Takalloo, H. Seifi and J. D. W. Madden, in *Electroactive Polymer Actuators and Devices (EAPAD) 2017*, SPIE, 2017, vol. 10163, pp. 186–197.
- 2 T. Shoa, J. D. Madden, C. W. E. Fok and T. Mirfakhrai, *Advances in Science and Technology*, 2008, **61**, 26–33.
- 3 M. R. Warren and J. D. Madden, *Journal of Electroanalytical Chemistry*, 2006, **590**, 76–81.
- 4 T. Shoa, D. S. Yoo, K. Walus and J. D. W. Madden, *IEEE/ASME Transactions on Mechatronics*, 2011, **16**, 42–49.
- 5 F. Bonafè, C. Dong, G. G. Malliaras, T. Cramer and B. Fraboni, *ACS Appl. Mater. Interfaces*, 2024, **16**, 36727–36734.
